# Supplementary material for: Graphene instead of graphite doping potassium ferrate for intrinsically reforming both conductivity and stability of super-iron( vi ) battery
Source: Royal Society of Chemistry journal article supplement (doi:10.1039/d5ra06254c), 2025-01-01
Supplement: d5ra06254c1.pdf [file d5ra06254c1.pdf]

## Supplementary Information

### FT-IR Spectroscopy Analysis

Comparative FT-IR spectroscopy was conducted to investigate the surface functional groups and interfacial interactions in the graphene-coated  $\text{K}_2\text{FeO}_4$  composite. The typical infrared spectral characteristic peak of the composite appears at around  $805\text{ cm}^{-1}$ . A key observation is that, compared to pure  $\text{K}_2\text{FeO}_4$ , this Fe-O characteristic peak exhibits reduced intensity, narrower width, and a distinct shift to a lower wavenumber (redshift). This redshift suggests a modification of the Fe=O bond environment, which is consistent with a strong electronic interaction at the interface, potentially including electron donation from graphene to  $\text{K}_2\text{FeO}_4$  that contributes to the enhanced stability of the composite.

The characteristic peaks of the composite include the strongest Fe–O bond feature at  $780\text{ cm}^{-1}$ , a residual nitrate N–O bond peak at  $1236\text{ cm}^{-1}$ , and a peak around  $3163\text{ cm}^{-1}$  for the H–O bond of free water. Compared to the pristine  $\text{K}_2\text{FeO}_4$ , the major functional groups are largely preserved. Additionally, two new diffraction peaks appear at  $1600\text{ cm}^{-1}$  and  $3683\text{ cm}^{-1}$ , which are close to the characteristic peaks of pure graphene, suggesting that graphene functional groups have been successfully incorporated onto the surface of the  $\text{K}_2\text{FeO}_4$  solid.

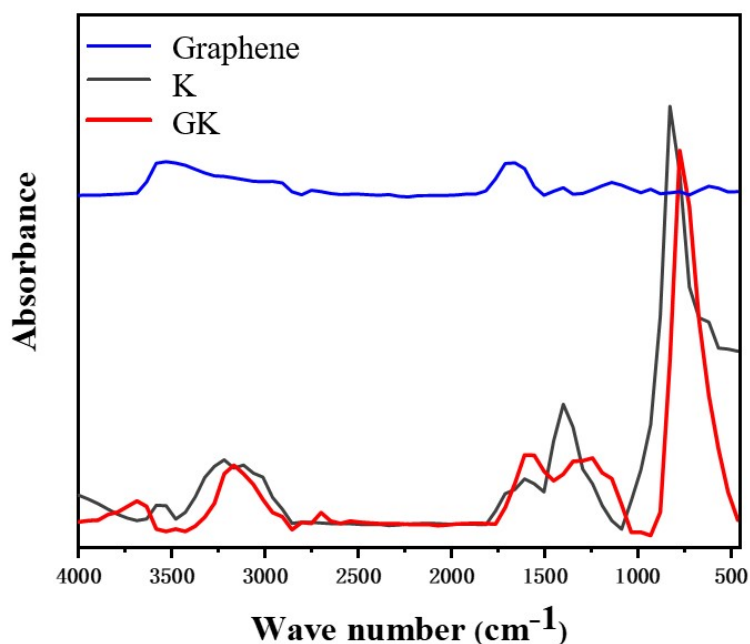

**Fig.1** FT-IR spectra of graphene, unmodified  $\text{K}_2\text{FeO}_4$ (K), and graphene-modified  $\text{K}_2\text{FeO}_4$ (GK)

### X-ray Diffraction Analysis

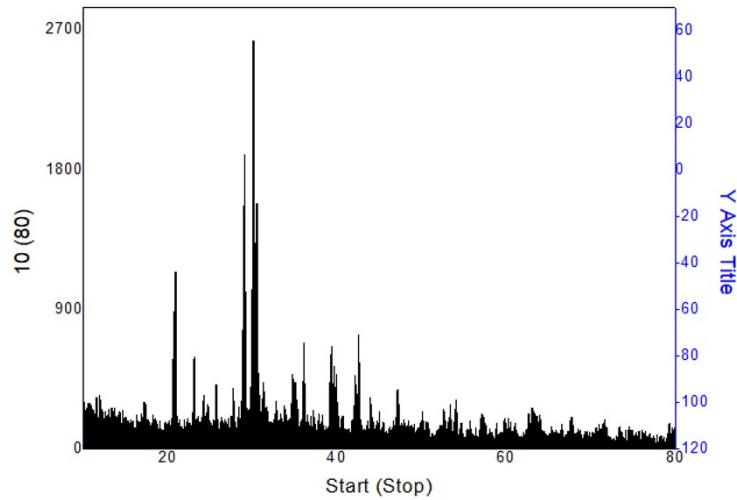

**Fig.2** X-ray Diffraction (XRD) pattern of graphene-modified  $K_2FeO_4$ (GK)

**Successful Coating Formation:** The disappearance of the sharp GO peak at  $\sim 10.0^\circ$  and the emergence of a broad RGO halo at  $\sim 24.0^\circ$  quantitatively confirm the reduction of GO and the formation of a poorly ordered, few-layer graphene coating. The calculated d-spacing change from  $\sim 0.88$  nm to  $\sim 0.37$  nm provides a key numerical parameter evidencing this transformation.

**Crystallite Size Integrity:** Application of the Debye-Scherrer equation to the main  $K_2FeO_4$  peaks shows that the average crystallite size remains statistically unchanged after coating. This quantifies that the dramatic surface roughening seen in SEM is due to the graphene deposition and not an alteration of the primary  $K_2FeO_4$  particles.

**Phase Purity Assessment:** The low intensity of the impurity peak at  $\sim 23.5^\circ$  relative to the main  $K_2FeO_4$  peaks provides a semi-quantitative metric for the material's high purity.
